# Supplementary material for: Reproductive strategies of two color morphs of Paeonia delavayi
Source: Frontiers journal article supplement (doi:10.3389/fpls.2025.1531186), 2025-03-19
Supplement: Table_3.xls [file Table_3.xls]

## Sheet: Floral traits (LWS)
LWS		the red morphs
		Flower diameter	Flower height	Stamen diameter	Stamen height	Pistil height	Stamen-pistil shortest distance	Number of Stamen	Petal number
		39.83	13.59	16.75	9.97	11.29	-1.32	155	9
		44.34	14.12	14.51	10.51	10.23	0.28	162	8
		44.69	20.83	20.86	12.76	8.81	3.95	169	9
		44.16	23.81	20.91	11.18	8.27	2.91	147	9
		50.59	22.79	21.25	10.36	10.14	0.22	154	9
		48.33	23.87	20.39	10.48	8.88	1.6	157	9
		50.48	24.83	19.64	10.72	7.09	3.63	161	9
		44.69	15.12	19.84	11.21	7.41	3.8	174	9
		47.33	22.87	19.39	9.48	9.04	0.44	158	8
		39.63	21.57	21.44	10.48	8.68	1.8	149	9
		43.44	16.99	17.61	9.99	10.27	-0.28	152	9
		48.32	16.06	20.13	11.19	10.49	0.7	144	9
		40.42	14.21	15.87	11.32	12.61	-1.29	158	8
		39.07	16.93	21.84	13.06	11.72	1.34	139	9
		51.17	23.62	26.49	11.33	11.48	-0.15	177	8
		50.24	23.67	26.48	11.21	10.58	0.63	154	9
		41.33	18.87	21.77	10.59	10.16	0.43	159	9
		43.88	25.31	21.57	11.25	10.77	0.48	139	9
		48.73	16.16	20.83	10.62	9.38	1.24	164	10
		37.53	18.33	18.58	11.39	8.97	2.42	146	8
		40.33	24.87	20.77	9.59	10.24	-0.65	160	8
		45.16	18.86	21.44	9.85	11.1	-1.25	139	10
		50.78	19.07	17.61	10.32	11.69	-1.37	162	9
		46.54	21.28	20.13	8.32	12.81	-4.49	144	9
		42.12	15.47	15.87	12.66	13.75	-1.09	162	8
		52.51	16.04	19.26	11.57	13.31	-1.74	152	9
		56.71	18.71	21.84	12.35	11.44	0.91	139	10
		54.36	25.85	14.49	10.33	11.23	-0.9	162	9
		59.05	23.08	14.48	10.36	11.23	-0.87	154	9
		52.95	28.68	21.77	9.76	13.13	-3.37	159	9
		60.78	20.77	21.57	11.35	11.35	0	165	11
		56.12	19.65	20.83	10.31	9.44	0.87	174	9
		46.73	19.65	18.58	11.21	11.75	-0.54	146	9
		51.95	17.68	20.77	11.76	10.12	1.64	153	8
		41.72	18.71	20.21	9.79	12.72	-2.93	139	9
		49.12	18.19	17.23	11.28	13.81	-2.53	152	9
		46.37	16.41	18.83	11.28	14.08	-2.8	144	9
		41.54	15.28	14.21	10.25	14.17	-3.92	142	10
		40.92	16.62	19.84	12.37	14.31	-1.94	152	8
		54.72	15.49	21.42	12.97	12.42	0.55	149	8
		51.12	25.19	21.71	10.43	12.53	-2.1	177	9
		56.37	26.41	23.37	10.18	12.42	-2.24	154	9
		50.69	21.2	23.91	12.68	13.65	-0.97	151	9
		58.91	20.11	24.61	10.73	12.92	-2.19	169	8
		45.54	18.21	22.63	11.21	11.39	-0.18	164	9
		45.54	18.91	18.34	11.21	12.48	-1.27	146	10
		49.69	21.2	22.91	8.68	11.14	-2.46	153	7
		35.89	14.16	19.95	9.42	14.47	-5.05	169	7
		48.12	17.41	16.97	10.01	15.96	-5.95	152	9
		44.53	21.34	18.57	8.95	15.24	-6.29	144	11
		38.04	14.41	13.95	8.88	14.17	-5.29	162	9
		39.92	15.62	19.58	11.96	14.32	-2.36	159	9
		47.17	21.51	21.16	12.27	12.43	-0.16	135	8
		43.94	22.43	21.45	9.76	12.7	-2.94	167	8
		44.53	15.34	23.11	10.95	12.01	-1.06	154	9
		40.5	22.59	23.65	10.87	14.04	-3.17	151	10
		44.14	20.14	24.35	8.67	13.04	-4.37	159	9
		47.98	22.52	22.37	9.79	12.03	-2.24	164	9
		38.34	18.88	18.08	10.12	16.22	-6.1	146	9
		39.5	16.59	22.65	8.97	15.66	-6.69	153	11
		the yellow morphs
		Flower diameter	Flower height	Stamen diameter	Stamen height	Pistil height	Stamen-pistil shortest distance	Number of Stamen	Petal number
		48.12	14.05	18.91	10.41	8.97	1.44	139	9
		46.32	19.55	20.87	9.15	9.51	-0.36	152	8
		45.86	17.25	19.51	7.94	11.76	-3.82	132	9
		43.36	14.56	20.56	10.14	10.18	-0.04	135	8
		48.85	17.65	19.65	10.11	9.36	0.75	145	9
		40.82	18.62	14.48	8.88	9.48	-0.6	136	8
		46.68	17.74	18.58	9.45	9.72	-0.27	121	8
		49.37	11.08	18.35	9.77	10.21	-0.44	133	8
		45.27	17.05	17.11	9.68	8.48	1.2	127	8
		42.82	13.62	17.05	7.11	9.48	-2.37	127	8
		44.73	15.33	18.58	9.86	8.99	0.87	119	8
		43.18	17.82	17.78	9.01	10.19	-1.18	130	8
		43.03	16.61	16.93	9.86	10.32	-0.46	99	9
		47.01	14.71	20.26	10.61	12.06	-1.45	139	10
		41.49	20.74	21.93	10.16	10.33	-0.17	152	9
		41.54	13.97	20.24	8.57	10.21	-1.64	114	8
		40.56	14.99	21.34	10.77	9.59	1.18	109	8
		39.56	19.36	19.36	10.73	10.25	0.48	145	8
		43.86	18.43	19.21	10.72	9.62	1.1	121	8
		43.31	12.85	19.11	8.97	10.39	-1.42	106	9
		41.55	18.14	17.73	8.88	8.59	0.29	127	8
		36.34	16.14	18.79	9.43	8.85	0.58	119	8
		41.54	18.88	18.49	8.71	9.32	-0.61	115	8
		37.04	17.82	17.21	9.86	7.32	2.54	99	8
		54.39	15.66	20.18	10.72	11.66	-0.94	139	8
		46.29	22.91	21.79	10.28	10.57	-0.29	152	8
		48.01	16.34	20.09	9.21	11.35	-2.14	103	8
		49.01	16.34	21.19	11.22	9.33	1.89	109	8
		50.74	22.54	19.36	10.93	9.36	1.57	150	9
		52.27	21.63	15.36	10.13	8.76	1.37	116	10
		42.46	20.74	19.87	11.76	10.35	1.41	121	9
		46.21	14.18	18.29	9.36	9.31	0.05	106	8
		56.15	19.51	16.93	8.94	10.21	-1.27	127	7
		42.56	20.36	16.42	7.93	10.76	-2.83	127	7
		49.11	16.69	18.51	10.69	8.79	1.9	119	9
		46.81	20.98	17.59	11.78	10.28	1.5	109	8
		47.15	21.01	17.28	11.49	10.28	1.21	127	9
		50.82	15.29	20.11	10.12	9.25	0.87	139	8
		49.56	22.71	21.26	9.68	11.37	-1.69	152	9
		42.44	15.26	19.71	8.61	11.97	-3.36	123	8
		46.34	16.06	20.91	10.62	9.43	1.19	120	8
		49.74	22.54	19.24	10.33	9.18	1.15	145	8
		46.12	20.95	15.97	9.53	11.68	-2.15	116	8
		41.29	19.15	18.92	11.16	9.73	1.43	121	10
		42.32	13.82	17.95	8.76	10.21	-1.45	106	8
		50.13	19.12	17.24	8.34	10.21	-1.87	137	6
		42.56	21.36	16.21	7.33	7.68	-0.35	117	9
		47.04	16.61	18.75	10.09	8.42	1.67	119	6
		44.93	19.65	18.53	11.18	9.01	2.17	109	9
		43.18	19.99	16.59	10.89	7.95	2.94	126	8
		44.84	15.28	19.98	9.88	7.88	2	139	8
		43.86	21.71	21.67	9.77	10.96	-1.19	152	8
		40.42	14.84	20.09	8.81	11.27	-2.46	124	9
		39.52	15.23	21.45	11.01	8.76	2.25	109	8
		49.56	21.36	20.04	11.54	9.95	1.59	145	9
		36.31	19.62	16.37	10.15	9.87	0.28	126	8
		40.54	18.71	19.59	11.08	7.67	3.41	121	9
		40.56	20.36	16.62	8.54	8.79	-0.25	129	8
		37.74	19.21	18.34	11.91	9.12	2.79	109	8
		34.73	18.33	16.99	11.69	7.97	3.72	125	8

## Sheet: Floral traits (XGLL)
XGLL	the red morphs
		Flower diameter	Flower height	Stamen diameter	Stamen height	Pistil height	Stamen-pistil shortest distance	Number of Stamen	Petal number
	1	51.14	30.55	27.65	13.18	9.92	3.26	302	9
	2	33.12	27.47	26.21	18.49	19.87	-1.38	162	13
	3	36.85	27.27	29.34	16.58	11.21	5.37	389	15
	4	41.51	32.06	29.27	15.02	10.73	4.29	269	12
	5	52.98	32.13	23.77	14.07	10.18	3.89	302	9
	6	42.37	32.72	29.84	19.59	14.59	5	218	13
	7	52.98	32.13	28.77	17.07	13.18	3.89	242	12
	8	44.81	39.24	29.72	17.21	14.34	2.87	248	13
	9	38.14	33.36	32.05	16.68	12.73	3.95	271	13
	10	58.37	32.72	29.14	16.94	13.37	3.57	190	15
	11	56.69	33.62	30.62	18.27	15.22	3.05	289	9
	12	62.51	34.48	29.07	16.48	14.06	2.42	269	12
	13	59.07	33.04	23.57	15.16	12.97	2.19	302	10
	14	70.74	35.37	27.62	11.44	10.06	1.38	162	13
	15	76.76	33.01	29.64	16.14	15.65	0.49	218	13
	16	58.07	31.04	28.57	13.16	11.66	1.5	231	15
	17	59.07	33.04	28.57	17.16	14.97	2.19	242	12
	18	55.38	31.51	31.18	17.35	15.49	1.86	321	13
	19	56.81	35.91	29.52	17.79	16.29	1.5	248	13
	20	51.21	34.45	31.85	17.41	14.84	2.57	271	13
	21	58.37	32.72	28.24	16.44	14.69	1.75	359	15
	22	56.69	33.62	29.72	17.77	15.87	1.9	289	18
	23	62.51	34.48	28.17	15.98	15.87	0.11	269	12
	24	59.07	33.04	22.67	14.66	14.61	0.05	302	10
	25	70.74	35.37	26.72	19.94	13.74	6.2	162	13
	26	72.76	33.01	28.74	15.64	16.71	-1.07	218	13
	27	58.07	31.04	27.67	12.66	13.32	-0.66	231	15
	28	59.07	33.04	27.67	16.66	18.66	-2	242	12
	29	55.38	31.51	30.28	16.85	17.22	-0.37	321	13
	30	56.81	35.91	28.62	17.29	18.58	-1.29	248	13
	31	61.36	33.33	28.92	16.33	13.91	2.42	282	12
	32	61.76	33.73	28.88	20.09	13.87	6.22	278	12
	33	62.51	34.48	29.07	16.48	14.06	2.42	269	12
	34	62.51	34.48	28.17	15.98	15.87	0.11	269	12
	35	63.66	35.63	28.32	16.13	16.02	0.11	282	12
	36	65.61	31.86	29.49	15.99	15.5	0.49	231	13
	37	66.76	33.01	28.74	15.64	16.71	-1.07	218	13
	38	67.58	37.94	32.98	18.18	15.97	2.21	135	10
	39	68.73	38.09	33.13	18.33	16.12	2.21	222	10
	40	70.74	35.37	27.62	18.94	10.06	8.88	162	13
	41	51.21	34.45	30.95	16.91	17.23	-0.32	271	13
	42	46.29	31.49	27.84	16.12	14.69	1.43	369	15
	43	49.01	31.71	29.32	21.57	15.87	5.7	289	18
	44	53.33	33.87	27.77	16.37	15.87	0.5	269	12
	45	55.43	32.33	22.27	15.11	14.61	0.5	302	10
	46	55.43	32.33	27.27	17.11	18.66	-1.55	242	10
	47	55.48	36.65	31.83	16.89	18.72	-1.83	222	10
	48	48.37	35.62	25.22	15.8	18.58	-2.78	248	9
	49	47.24	32.44	26.99	16.27	14.84	1.43	202	15
	50	47.26	27.36	31.53	17.84	14.72	3.12	334	13
	51	48	28.42	24.49	16.73	11.36	5.37	202	15
	52	48.37	35.62	28.22	15.8	18.58	-2.78	248	13
	53	49.01	31.71	24.32	13.37	15.87	-2.5	289	9
	54	49.96	32.66	26.47	13.52	16.02	-2.5	302	9
	55	51.21	34.45	31.85	17.41	14.84	2.57	271	13
	56	51.21	34.45	26.95	16.91	17.23	-0.32	271	13
	57	52.36	35.6	31.1	17.06	17.38	-0.32	284	13
	58	52.98	32.13	23.77	14.07	10.18	3.89	302	10
	59	53.33	33.87	26.77	16.37	15.87	0.5	269	12
	60	50.39	29.8	27.46	12.99	9.73	3.26	311	10
	the yellow morphs
		Flower diameter	Flower height	Stamen diameter	Stamen height	Pistil height	Stamen-pistil shortest distance	Number of Stamen	Petal number
	1	40.35	26.48	27.54	14.87	13.52	1.35	192	9
	2	34.01	27.45	21.98	16.15	15.76	0.39	119	9
	3	48.09	30.51	25.08	12.99	9.92	3.07	121	8
	4	30.91	26.57	20.27	10.89	7.11	3.78	125	9
	5	29.86	26.73	23.18	15.78	13.78	2	119	8
	6	34.56	31.03	22.14	13.73	11.01	2.72	128	9
	7	35.09	28.31	21.77	14.09	12.89	1.2	179	9
	8	28.23	24.92	22.48	14.71	11.42	3.29	180	8
	9	26.35	26.74	22.49	12.83	8.18	4.65	182	8
	10	32.33	25.87	19.78	10.18	9.9	0.28	189	10
	11	34.88	25.31	21.57	10.75	12.41	-1.66	158	10
	12	32.17	30.48	26.68	14.41	10.59	3.82	159	10
	13	35.34	26.02	24.48	12.59	12.41	0.18	162	9
	14	67.57	28.66	27.55	13.07	14.39	-1.32	165	8
	15	72.43	29.12	26.64	15.29	15.98	-0.69	130	10
	16	69.71	35.01	25.09	12.11	10.28	1.83	190	8
	17	45.28	33.16	21.85	16.22	10.12	6.1	171	8
	18	58.12	33.99	23.19	14.91	14.5	0.41	130	8
	19	55.91	33.75	24.37	14.83	11.52	3.31	132	8
	20	61.51	32.48	22.27	16.36	13.18	3.18	164	8
	21	46.26	31.07	25.41	11.96	11.9	0.06	174	9
	22	56.17	30.91	25.19	17.93	9.02	8.91	154	8
	23	61.98	32.13	20.95	9.47	11.8	-2.33	134	10
	24	59.11	33.85	23.79	10.95	14.91	-3.96	134	9
	25	48.42	31.49	29.51	14.92	11.39	3.53	143	8
	26	60.57	27.99	25.58	12.38	14.91	-2.53	143	9
	27	67.57	34.66	27.95	13.88	14.87	-0.99	143	9
	28	72.43	34.12	26.21	15.11	16.32	-1.21	140	9
	29	69.71	35.01	24.64	12.01	10.42	1.59	142	9
	30	45.28	33.16	22.42	11.54	11.33	0.21	139	9
	31	58.12	33.99	26.87	15.01	15.68	-0.67	147	9
	32	55.91	33.75	24.54	13.81	12.67	1.14	140	10
	33	61.51	32.48	23.15	11.28	13.97	-2.69	167	8
	34	46.26	31.07	24.99	11.78	13.07	-1.29	147	9
	35	56.17	30.91	24.71	12.03	11.37	0.66	187	10
	36	61.98	32.13	23.67	10.92	12.61	-1.69	148	9
	37	59.11	33.85	24.55	11.33	16.73	-5.4	218	8
	38	48.42	31.49	29.51	14.92	13.45	1.47	158	8
	39	60.57	27.99	27.09	12.71	16.73	-4.02	143	8
	40	60.02	30.14	27.01	15.88	15.04	0.84	156	9
	41	50.93	31.45	27.61	15.11	16.65	-1.54	159	9
	42	69.56	34.93	24.14	13.01	10.42	2.59	159	9
	43	44.23	32.73	21.46	14.54	11.66	2.88	159	9
	44	56.22	28.78	26.09	15.01	15.68	-0.67	159	9
	45	55.91	29.75	23.54	13.81	14.16	-0.35	160	8
	46	50.14	30.55	24.91	14.28	14.06	0.22	162	10
	47	38.82	29.77	24.37	14.78	13.07	1.71	172	9
	48	45.01	34.62	23.71	13.03	12.43	0.6	165	8
	49	50.41	30.16	24.27	10.92	12.61	-1.69	170	9
	50	53.91	30.11	25.61	11.33	16.93	-5.6	172	8
	51	58.41	31.91	28.61	14.92	14.02	0.9	175	8
	52	50.91	30.11	29.61	14.33	18.93	-4.6	176	9
	53	55.41	31.91	32.61	17.92	16.02	1.9	178	9
	54	48.88	32.4	31.76	18.26	18.8	-0.54	192	8
	55	54.17	34.73	30.24	18.16	17.83	0.33	203	9
	56	48.36	36.11	28.42	14.07	14.76	-0.69	192	8
	57	51.86	31.06	29.76	14.48	19.08	-4.6	201	9
	58	56.36	32.86	32.76	18.07	16.17	1.9	160	10
	59	53.81	34.37	30.68	18.6	18.27	0.33	158	10
	60	46.97	27.57	27.55	13.71	16.93	-3.22	156	10

## Sheet: NO.dehiscent anthers（ LWS）
LWS
the red morphs										the yellow morphs
	R-Day 1	R-Day 2	R-Day 3	R-Day 4	R-Day 5	Total number of anther dehiscence	Total number of anthers				Y-Day 1	Y-Day 2	Y-Day 3	Y-Day 4	Y-Day 5	Total number of anther dehiscence	Total number of anthers
	5	25	35	41	26	132	139				3	39	38	36	1	117	129
	3	26	90	29	3	151	152				6	27	52	42	14	141	142
	3	16	68	15	0	102	103				4	43	39	36	10	132	134
	3	33	48	15	9	108	109				0	47	24	49	0	120	122
	5	47	55	30	7	144	145				3	30	24	41	12	110	122
	10	50	33	19	9	121	121				4	34	49	32	8	127	129
	4	17	51	27	21	120	121				3	40	80	36	6	165	167
	3	13	46	24	9	95	106				5	27	66	38	6	142	144
	9	34	43	24	14	124	127				3	36	68	28	4	139	141
	4	18	43	30	31	126	127				2	20	50	40	7	119	129
	5	47	50	14	2	118	119				5	17	103	38	14	177	172
	1	17	41	40	9	108	109				2	46	30	52	4	134	136
	2	29	43	14	10	98	99				4	27	66	38	6	141	143
	8	25	35	41	26	135	135				1	11	39	36	28	115	117
	4	26	40	29	31	130	130				5	24	87	22	42	180	180
	3	16	48	15	19	101	101				4	20	43	36	29	132	132
	7	16	48	15	19	105	105				6	60	107	9	14	196	196
	5	16	55	30	47	153	153				3	22	30	41	14	110	110
	4	50	9	33	19	115	115				4	18	34	32	39	127	127
	6	17	21	27	51	122	122				3	16	40	36	70	165	165
	3	13	46	24	9	95	95				5	36	97	8	56	202	242
	5	14	43	24	24	110	110				3	14	36	28	58	139	139
	4	18	43	30	31	126	126				2	17	20	40	40	119	119
	3	14	50	2	47	116	116				0	24	17	58	63	162	162
	1	17	41	40	9	108	108				2	14	46	52	20	134	134
	2	10	14	43	29	98	98				4	16	27	38	56	141	141
	7	21	46	33	34	141	141				10	25	48	28	48	159	159
	9	20	56	8	53	146	146				6	30	64	23	69	192	192
	7	23	47	46	15	138	138				5	17	79	25	23	149	149
	7	15	19	48	34	123	123				7	19	30	41	59	156	156
Mean	4.73333	23.4333	43.5667	27	21.5667		121.3				3.75	26.7857	51.5357	35.0357	28.75		147.667
S.E.	0.433996	2.11328	2.80872	2.11834	2.71889						0.378746	2.16365	4.60568	2.01497	4.20162

## Sheet: NO.dehiscent anthers（ XGLL）
XGLL
the red morphs										the yellow morphs
	R-Day 1	R-Day 2	R-Day 3	R-Day 4	R-Day 5	R-Day 6	Total number of anther dehiscence	Total number of anthers			Y-Day 1	Y-Day 2	Y-Day 3	Y-Day 4	Y-Day 5	Y-Day 6	Total number of anther dehiscence	Total number of anthers
	5	37	129	26	22	0	219	219			5	24	70	25	4	0	128	192
	1	12	139	84	55	26	317	317			0	35	97	10	11	26	179	179
	9	17	63	40	3	29	161	189			6	24	68	30	20	0	148	148
	1	40	207	27	22	0	297	297			0	5	43	38	17	1	104	129
	3	12	191	30	5	0	241	302			1	16	53	36	9	0	115	119
	1	60	116	34	5	0	216	216			0	38	69	41	11	0	159	159
	5	33	59	53	55	0	205	218			6	26	55	44	27	0	158	159
	3	28	105	37	58	0	231	231			4	22	51	60	40	0	177	178
	8	35	82	49	67	0	241	242			7	17	56	54	61	0	195	196
	2	10	45	77	87	0	221	222			2	24	40	30	46	0	142	143
	4	27	108	70	37	0	246	321			3	10	48	54	17	15	147	147
	0	24	128	57	39	0	248	248			4	10	67	46	7	0	134	134
	4	43	91	31	14	0	183	271			4	17	59	57	15	7	159	172
	1	15	94	94	78	0	282	283			4	8	84	29	20	20	165	165
	1	39	110	105	17	0	272	272			5	21	106	60	16	0	208	209
	4	36	75	86	27	0	228	229			10	49	55	46	29	0	189	189
	2	16	84	58	29	0	189	190			8	21	58	45	27	1	160	170
	6	52	90	53	47	0	248	248			3	33	22	53	27	0	138	139
	3	16	111	97	42	51	320	420			2	13	33	44	43	0	135	136
	5	7	22	129	26	99	288	289			12	65	33	32	37	0	179	179
	2	26	112	25	41	50	256	356			4	18	28	33	55	0	138	139
	3	32	108	70	43	52	308	308			4.7619	42	53.5714	41.2857	25.6667	0	167.286	167.286
	4	26	155	56	85	0	326	326			12	75	32	37	33	1	190	190
	1	12	55	139	84	0	291	291			1	17	62	48	33	1	162	162
	3	22	30	191	5	61	312	312			4	18	33	55	28	1	139	139
	5	30	55	59	53	26	228	228			3	12	104	75	20	1	215	215
	3	28	58	105	37	0	231	231			4	8	84	20	29	1	146	146
	8	55	107	82	9	0	261	262			5	21	60	36	6	1	129	129
	2	10	87	45	77	1	222	222			13	63	43	17	30	1	167	167
	4	37	108	70	37	75	331	331			6	24	68	20	30	0	148	148
Mean	3.43333	27.9	97.4667	69.3	40.2	15.6667		269.7		Mean	4.75873	25.8667	57.819	40.5429	25.7889	2.56667	157.343	161.476
S.E.	0.411566	2.54493	7.66088	6.92806	4.68414	5.00375				S.E.	0.630007	3.19724	3.95312	2.6738	2.55981	1.15538
